# Supplementary material for: Polyamide precursors from renewable 10-undecenenitrile and methyl acrylate via olefin cross-metathesis
Source: Royal Society of Chemistry journal article supplement (doi:10.1039/c2gc35648a), 2012-01-01
Supplement: c2gc35648a.pdf [file c2gc35648a.pdf]

# Polyamide precursors from renewable 10-undecenitrile and methyl acrylate via olefin cross-metathesis

X. Miao,<sup>a</sup> C. Fischmeister,<sup>a</sup> P. H. Dixneuf,<sup>a</sup> C. Bruneau,<sup>a</sup> J.-L. Dubois,<sup>b</sup> J.-L. Couturier<sup>c</sup>

<sup>a</sup>UMR 6226-CNRS –Université de Rennes 1, Institut des Sciences Chimiques de Rennes, Campus de Beaulieu, 35042, Rennes cedex, France.

<sup>b</sup>Arkema, , 420 Rue d'Estienne d'Orves, 92705 Colombes (France)

<sup>c</sup>Arkema, CRRA, BP 63, rue Henry Moissan, 69493, Pierre Bénite (France)

## Supporting Information

### General Informations

All reactions were carried out with exclusion of air using Schlenk tube techniques. Organic solvents were dried by standard procedures and distilled under argon prior to use. 10-Undecenitrile supplied by Arkema was distilled under vacuum and stored under Argon prior to use. Methyl acrylate was purchased from Acros Organics and stored under Argon over 4 Å MS prior to use. *t*BuOK (98%) was purchased from Alfa Aesar and stored under Argon. <sup>1</sup>H NMR spectra were recorded at 200 MHz and 300 MHz. <sup>13</sup>C NMR spectra were recorded at 50.3 MHz and 75.5 MHz. Reactions were monitored using a Shimadzu 2014 gas chromatograph equipped with Equity<sup>TM</sup> – 1 Fused Silica capillary column. Pure products were obtained by column chromatography on silica gel (Merck Silica Gel 60) using mixtures of petroleum ether and diethyl ether or a mixture of petroleum ether and ethyl acetate as the eluent. High resolution mass spectrometry data (HR-MS) was recorded using Varian Mat 311 equipped with a magnetic field, an electric field (geometry BE) and a room of collisions. Elemental analysis data were obtained on a microanalyser (Microanalyseur Flash EA1112 CHNS/O Thermo Electron). Products were further analyzed by GC-MS on a Shimadzu QP2010S apparatus.

### General procedure for the cross-metathesis of 10-undecenitrile **1** with methyl acrylate.

83 mg of **1** (0.5 mmol, 1 equiv.) and 0.09 ml of methyl acrylate (1 mmol, 2 equiv.) were dissolved in 10 ml of distilled toluene with dodecane (10 µl) as internal standard. 1.6 mg of complex **II** (0.5 mol%) was added and the reaction was stirred at 50 °C for 1 h. After solvent evaporation, the product was purified by column chromatography on silica gel using a mixture of petroleum ether/diethyl ether (8/2) as eluent to furnish **3** as a mixture of *E* and *Z* isomers that could be partially separated during column chromatography purification.

*E* isomer:

**<sup>1</sup>H NMR (300.13 MHz, CDCl<sub>3</sub>)** δ ppm: 1.32-1.71 (m, 12 H, 6 CH<sub>2</sub>); 2.20 (m, 2 H, CH<sub>2</sub>CH=CHCO); 2.34 (t, 2 H, <sup>3</sup>J<sub>HH</sub> = 7.0 Hz, NCCH<sub>2</sub>); 3.73 (s, 3 H, OCH<sub>3</sub>); 5.83 (d, 1 H, <sup>3</sup>J<sub>HH</sub> = 15.7 Hz, CH=CHCO); 6.70 (dt, 1 H, <sup>3</sup>J<sub>HH</sub> = 15.7 Hz, <sup>3</sup>J<sub>HH</sub> = 7.0 Hz, CH=CHCO).

**<sup>13</sup>C NMR (75.5 MHz, CDCl<sub>3</sub>)** δ ppm: 17.1, 25.3, 27.9, 28.6, 28.6, 28.9, 29.0, 32.1 (CH<sub>2</sub>); 51.4 (OCH<sub>3</sub>); 119.8 (CN); 120.9 (CH=CHCO<sub>2</sub>Me); 149.6 (CH=CHCO<sub>2</sub>Me); 167.2 (C=O).

**Elemental Analysis:** Calculated for C<sub>13</sub>H<sub>21</sub>NO<sub>2</sub>: C: 69.92; H: 9.48; N: 6.27; found: C: 69.27; H: 9.45; N: 6.42

**HRMS:** [M+Na]<sup>+</sup> (C<sub>13</sub>H<sub>21</sub>NO<sub>2</sub>Na) m/z Calculated : 246.1470, measured: 246.1469

*Z* isomer

**<sup>1</sup>H NMR (300.13 MHz, CDCl<sub>3</sub>)** δ ppm: 1.34-1.72 (m, 12 H, 6 CH<sub>2</sub>); 2.35 (t, 2 H, <sup>3</sup>J<sub>HH</sub> = 7.1 Hz, NCCH<sub>2</sub>); 2.66 (m, 2 H, CH<sub>2</sub>CH=CHCO); 3.72 (s, 3 H, OCH<sub>3</sub>); 5.79 (dt, 1 H, <sup>3</sup>J<sub>HH</sub> = 11.5 Hz, <sup>3</sup>J<sub>HH</sub> = 1.5 Hz, CH=CHCO); 6.70 (dt, 1 H, <sup>3</sup>J<sub>HH</sub> = 11.5 Hz, <sup>3</sup>J<sub>HH</sub> = 7.5 Hz, CH=CHCO).

**General procedure for the cross-metathesis of 10-undecenitrile **1** with methyl acrylate using syringe pump slow addition of catalyst.**

332 mg of **1** (2 mmol, 1 equiv.) and 0.36 ml of methyl acrylate (4 mmol, 2 equiv.) were dissolved in 38 ml of distilled toluene with dodecane (10 µl) as internal standard. The desired amount of catalyst was dissolved in 2 ml of toluene and added dropwise over a period of 2 h 40 min into the reaction mixture heated at the desired temperature (see picture). After completion of the catalyst addition, the reaction was stirred for 2 h 20 min. Total reaction time 5 h.

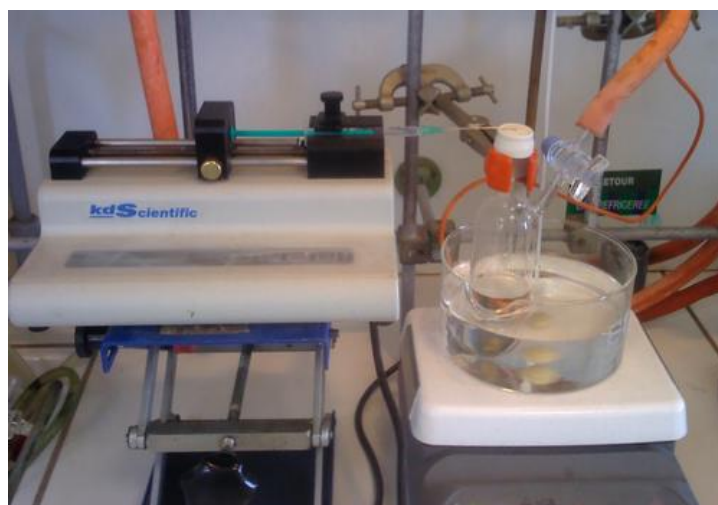

### Representative general Procedure for Tandem Cross-metathesis of **1** with methyl acrylate / Hydrogenation to saturated amino-ester **7**

83 mg of **1** (0.5 mmol, 1 equiv.) and 0.09 ml of methyl acrylate (1 mmol, 2 equiv.) were dissolved in 10 ml of distilled toluene with dodecane (10  $\mu$ l) as internal standard. 9.4 mg (0.015 mmol, 3 mol%) of complex **II** were added and the reaction mixture stirred at room temperature for 1h. The crude reaction solution containing the residual ruthenium was transferred into an autoclave.  $t$ -BuOK (0.15 mmol, 16.8 mg, 30 mol%) was added and the reactor was pressurised with 20 bar of  $H_2$ . The reaction was stirred at 80  $^{\circ}C$  for 40 h. After solvent evaporation the product was purified by extraction dichloromethane / 1 N HCl and dichloromethane / 1 N NaOH to furnish **7** as a yellowish solid. M = 102 mg (yield = 90%).

**$^1H$  NMR (300.13 MHz,  $CD_3OD$ )**  $\delta$  ppm: 1.33 (broad s, 14 H, 7  $\underline{CH_2}$ ); 1.54-1.64 (m, 4 H,  $\underline{CH_2CH_2NH_2} + \underline{CH_2CH_2CO_2Me}$ ); 2.33 (t, 2 H,  $^3J_{HH} = 7.4$  Hz,  $\underline{CH_2CO_2Me}$ ); 2.76 (t, 2 H,  $^3J_{HH} = 7.4$  Hz,  $\underline{CH_2NH_2}$ ); 3.66 (s, 3 H,  $O\underline{CH_3}$ ).

**$^{13}C$  NMR (75.5 MHz,  $CD_3OD$ )**  $\delta$  ppm: 24.7, 26.7, 28.9, 29.1, 29.3, 29.4, 29.4, 29.6, 32.1, 33.5, 41.1 ( $\underline{CH_2}$ ); 50.6 ( $O\underline{CH_3}$ ); 174.2 ( $\underline{C=O}$ ).

**HRMS:**  $[M+H]^+$  ( $C_{13}H_{28}NO_2$ ) m/z calculated: 230.2120, measured: 230.2121

$[M+Na]^+$  ( $C_{13}H_{27}NO_2Na$ ) m/z calculated: 252.1939, measured: 252.1937
